1     **The Dual-Antigen Ad5 COVID-19 Vaccine Delivered as an Intranasal Plus Subcutaneous**  
2             **Prime Elicits Th1 Dominant T-Cell and Humoral Responses in CD-1 Mice**

3  
4     Adrian Rice<sup>1</sup>ϕ, Mohit Verma<sup>1</sup>ϕ, Annie Shin<sup>1</sup>, Lise Zakin<sup>1</sup>, Peter Sieling<sup>1</sup>, Shiho Tanaka<sup>1</sup>, Joseph  
5     Balint<sup>1</sup>, Kyle Dinkins<sup>1</sup>, Helty Adisetiyo<sup>1</sup>, Brett Morimoto<sup>1</sup>, Justin Taft<sup>2,3</sup>, Roosheel Patel<sup>2,3</sup>,  
6     Sofija Buta<sup>2,3,4</sup>, Marta Martin-Fernandez<sup>2,3,4,5,6</sup>, Dusan Bogunovic<sup>2,3,4,5,6</sup>, Patricia Spilman<sup>1</sup>,  
7     Elizabeth Gabitzsch<sup>1</sup>, Jeffrey T. Safrit<sup>1</sup>, Shahrooz Rabizadeh<sup>1</sup>, Kayvan Niazi<sup>1</sup>, Patrick Soon-  
8     Shiong<sup>1</sup>\*

9  
10    ϕ These authors contributed equally

11    <sup>1</sup>ImmunityBio, Inc., 9920 Jefferson Blvd, Culver City, CA 90232, USA

12    <sup>2</sup>Center for Inborn Errors of Immunity, <sup>3</sup>Department of Pediatrics, <sup>4</sup>Precision Immunology  
13    Institute, <sup>5</sup>Mindich Child Health and Development Institute, <sup>6</sup>Department of Microbiology,  
14    Icahn School of Medicine at Mount Sinai, 1 Gustave Lane, Levy Place, New York, NY 10029-  
15    5674, USA

16  
17    \*Corresponding author: [Patrick@NantWorks.com](mailto:Patrick@NantWorks.com)

18

19

20

21

22

23

24

25 **ABSTRACT**

26 In response to the need for an efficacious, thermally-stable COVID-19 vaccine that can elicit  
27 both humoral and cell-mediated T-cell responses, we have developed a dual-antigen human  
28 adenovirus serotype 5 (hAd5) COVID-19 vaccine in formulations suitable for subcutaneous (SC),  
29 intranasal (IN), or oral delivery. The vaccine expresses both the SARS-CoV-2 spike (S) and  
30 nucleocapsid (N) proteins using an hAd5 platform with E1, E2b, and E3 sequences deleted  
31 (hAd5[E1-, E2b-, E3-]) that is effective even in the presence of hAd5 immunity. In the vaccine, S  
32 is modified (S-Fusion) for enhanced cell-surface display to elicit humoral responses and N is  
33 modified with an Enhanced T-cell Stimulation Domain (N-ETSD) to direct N to the  
34 endosomal/lysosomal pathway to increase MHC I and II presentation. Initial studies using  
35 subcutaneous (SC) prime and SC boost vaccination of CD-1 mice demonstrated that the hAd5 S-  
36 Fusion + N-ETSD vaccine elicits T-helper cell 1 (Th1) dominant T-cell and humoral responses to  
37 both S and N. We then compared SC to IN prime vaccination with either an SC or IN boost post-  
38 SC prime and an IN boost after IN prime. These studies reveal that IN prime/IN boost is as  
39 effective at generating Th1 dominant humoral responses to both S and N as the other combinations,  
40 but that the SC prime with either an IN or SC boost elicits greater T cell responses. In a third study  
41 to assess the power of the two routes of delivery when used together, we used a combined SC plus  
42 IN prime with or without a boost and found the combined prime alone to be as effective as the  
43 combined prime with either an SC or IN boost in generating both humoral and T-cell responses.  
44 The findings here in CD-1 mice demonstrate that combined SC and IN prime-only delivery has  
45 the potential to provide broad immunity – including mucosal immunity – against SARS-CoV-2  
46 and supports further testing of this delivery approach in additional animal models and clinical  
47 trials.

48

49

## 50 INTRODUCTION

51 In response to the need for a COVID-19 vaccine that is safe, effective, and suitable for global  
52 distribution, we have developed the dual antigen hAd5 S-Fusion + N-ETSD vaccine including  
53 formulations for subcutaneous (SC), oral, and intranasal (IN) delivery. The vaccine comprises the  
54 SARS-CoV-2 spike (S) protein optimized for cell surface expression (S-Fusion)<sup>1</sup> to increase  
55 humoral responses and the nucleocapsid protein with an Enhanced T-cell Stimulation Domain (N-  
56 ETSD) to target N to the endosomal/lysosomal cellular compartment to enhance MHC I and II  
57 presentation.<sup>2</sup>

58 The vaccine antigens are delivered using a human adenovirus serotype 5 (hAd5) vector with  
59 deletions in the E1, E2b, and E3 gene regions (hAd5 [E1-, E2b-, E3-]; Supplementary Fig. S1A).<sup>3</sup>  
60 Specifically, removal of the E2b regions confers advantageous immune properties by minimizing  
61 immune responses to Ad5 viral proteins such as viral fibers,<sup>4</sup> thereby eliciting potent immune  
62 responses to specific antigens in patients with pre-existing adenovirus (Ad) immunity.<sup>5,6</sup> Since  
63 these deletions allow the hAd5 platform to be efficacious even in the presence of existing Ad  
64 immunity, this platform enables relatively long-term antigen expression without significant  
65 induction of anti-vector immunity. It is therefore also possible to use the same vector/construct for  
66 homologous prime-boost therapeutic regimens.<sup>7</sup> Importantly, this next generation Ad vector has  
67 demonstrated safety in over 125 patients with solid tumors. In these Phase I/II studies, CD4+ and  
68 CD8+ antigen-specific T cells were successfully generated to multiple somatic antigens (CEA,  
69 MUC1, brachyury) even in the presence of pre-existing Ad immunity.<sup>5 8</sup>

70 SARS-CoV-2 is an enveloped positive sense, single-strand RNA  $\beta$  coronavirus primarily  
71 composed of four structural proteins - spike (S), nucleocapsid (N), membrane (M), and envelope  
72 (E) – as well as the viral membrane and genomic RNA. The S glycoprotein<sup>9-11</sup> is displayed as a  
73 trimer on the viral surface, whereas N is located within the viral particle (Supplementary Fig. S1B).

74 Spike initiates infection by the SARS-CoV-2 virus by interaction of its receptor binding domain  
75 (RBD) with the human host angiotensin-converting enzyme 2 (ACE2) expressed on the surface of  
76 cells in the respiratory system, including alveolar epithelial cells,<sup>12</sup> as well as cells in the digestive  
77 tract.

78 The majority of current SARS-CoV-2 vaccines under development deliver only the S antigen  
79 because antibodies raised against S RBD are expected to neutralize infection.<sup>13-15</sup> Reliance on S as  
80 the sole vaccine antigen is not without risk, however, particularly in the face of the rapidly  
81 dominating variants including the B.1.351 variant expressing E484K, K417N, and N501Y  
82 mutations;<sup>16</sup> the B.1.1.7 variant (N501Y);<sup>17,18</sup> and the Cal.20.C L452R variant<sup>19</sup> all of which  
83 have altered RBD sequences that may not be as effectively recognized by antibodies generated in  
84 response to first-wave S-based vaccines.

85 To lessen the risk of single-antigen delivery and to broaden protective immune responses, we  
86 included the N protein in our hAd5 S-Fusion + N-ETSD vaccine (Supplementary Fig. S1C). N is  
87 a highly conserved and antigenic SARS-CoV-2-associated protein that has been studied previously  
88 as an antigen in coronavirus vaccine design for SARS-CoV.<sup>20-23</sup> N associates with viral RNA and  
89 has a role in viral RNA replication, virus particle assembly, and release.<sup>24,25</sup> Studies have shown  
90 that nearly all patients infected with SARS-CoV-2 have antibody responses to N.<sup>26,27</sup> Furthermore,  
91 another study reported that most, if not all, COVID-19 survivors tested were shown to have N-  
92 specific CD4+ T-cell responses.<sup>15</sup>

93 The ability of N to elicit vigorous T-cell responses highlights another advantage of the addition  
94 of N. A robust T-cell response to vaccination is at least as important as the production of antibodies  
95<sup>28</sup> and should be a critical consideration for COVID-19 vaccine efficacy. First, humoral and T-cell  
96 responses are highly correlated, with titers of neutralizing antibodies being proportional to T-cell  
97 levels, suggesting the T response is necessary for an effective humoral response.<sup>29</sup> It is well

98 established that the activation of CD4+ T helper cells enhances B-cell production of antibodies.  
99 Second, virus-specific CD4+ and CD8+ T cells are widely detected in COVID-19 patients,<sup>30</sup> based  
100 on findings from patients recovered from the closely-related SARS-CoV, and there are reports that  
101 such T cells persist for at least 6–17 years, suggesting that T cells may be an important part of  
102 long-term immunity.<sup>31-33</sup> These T-cell responses were predominantly to N, as described in Le Bert  
103 *et al.*, who found that in all 36 convalescent COVID-19 patients in their study, the presence of  
104 CD4+ and CD8+ T cells recognizing multiple regions of the N protein could be demonstrated.<sup>33</sup>  
105 They further examined blood from 23 individuals who had recovered from SARS-CoV and found  
106 that the memory T cells acquired 17 years ago also recognized multiple proteins of SARS-CoV-2.  
107 These findings emphasize the importance of designing a vaccine with the highly conserved  
108 nucleocapsid present in both SARS-CoV and SARS-CoV-2. Third, recovered patients exposed to  
109 SARS-CoV-2 have been found without seroconversion, but with evidence of T-cell responses.<sup>34</sup>  
110 The T-cell based responses become even more critical given the finding in at least one study that  
111 neutralizing antibody titers decline in some COVID-19 patients after about 3 months.<sup>35</sup> The  
112 importance of both S and N was highlighted by Grifoni *et al.*<sup>15</sup> who identified both S and N  
113 antigens as *a priori* potential B and T-cell epitopes for the SARS-CoV virus that shows close  
114 similarity to SARS-CoV-2 that are predicted to induce both T and B cell responses.

115 Additional considerations for vaccine design beyond the choice of antigens, include the  
116 practicality of global distribution and the ability to generate mucosal immunity that provides the  
117 highest probability of preventing transmission. While the mRNA-based vaccines have shown  
118 excellent efficacy,<sup>36,37</sup> their requirement for extremely cold storage has presented a challenge,  
119 particularly for developing countries. Our hAd5 [E1-, E2b-, E3-] platform-based vaccine  
120 overcomes the need for super-cold storage, with the injectable and IN formulations requiring only

121 -20°C (up to one year) or 2-8°C (up to one month) storage. The oral formulation has a further  
122 advantage of being stable at room temperature.

123 IN or oral vaccine delivery also offers the potential for conferring mucosal immunity. SARS-  
124 CoV-2 is a mucosal virus<sup>38,39</sup> that in most instances of infections, initiates infection by entry to  
125 the nose and mouth. Similarly, it's most efficient route of transmission is by respiratory droplets  
126 that are then transmitted to other persons.<sup>40</sup> Thus a vaccine that also elicits protective mucosal  
127 responses mediated by IgA is more likely to reduce transmission as compared to systemic, IgG-  
128 only humoral and T-cell responses.<sup>41</sup>

129 It was our goal in the studies presented herein to confirm enhanced cell surface expression of  
130 S-Fusion as compared to S-WT (the localization of N-ETSD to endo/lysosomes is demonstrated  
131 in Sieling *et al.* 2020<sup>2</sup>) in *in vitro* studies, then assess humoral and T cell responses *in vivo* studies  
132 in CD-1 mice. In mice, first the immune responses to SC prime and SC boost vaccination were  
133 determined, then SC and IN prime delivery were compared. In a third experiment, the two routes  
134 of delivery were combined in a single boost to ascertain if together optimal immune responses  
135 could be achieved that may not necessarily be dependent upon a boost.

136 In all three study paradigms - SC prime with SC boost study, SC versus IN prime with boost,  
137 and combined SC plus IN prime with or without boost - immunization of CD-1 mice with the hAd5  
138 S Fusion + N-ETSD vaccine elicited Th1 dominant, virus-neutralizing humoral responses against  
139 S. Both CD4+ and CD8+ T-cell responses to SARS-CoV-2 S and N peptide pools were also seen,  
140 with cytokine production being greater overall in response to N peptides in all studies. Potent  
141 neutralization of SARS-CoV-2 by sera from vaccinated mice in all studies was confirmed by a  
142 surrogate neutralization assay.<sup>42</sup> While all dosing paradigms produced broad immune responses,  
143 perhaps the most significant and compelling finding was that a single prime administration by

144 combined SC and IN dosing generated immune responses that were at least as great as dosing  
145 regimens that included a boost.

146

## 147 **RESULTS**

### 148 **S-Fusion enhances cell-surface display of conformationally-relevant spike**

149 Before initiation of *in vivo* studies in mice, our goal of enhancing cell-surface display of S was  
150 confirmed by transfection of HEK-293T cells with hAd5 S wild type (S WT), S-WT plus N-ETSD,  
151 S-Fusion alone, and S-Fusion plus N-ETSD followed by flow cytometric analysis of anti-S  
152 receptor binding domain (S RBD) antibody binding. As shown in Supplementary Figure S2A-E,  
153 antibody binding was enhanced with S-Fusion as compared to S-WT and was found to be the  
154 highest for hAd5 S-Fusion plus N-ETSD. This enhanced cell surface expression was further  
155 confirmed by binding of recombinant ACE2, which was also the highest for hAd5 S-Fusion + N-  
156 ETSD (Supplementary Fig. S2F-H). The binding of both antibodies and ACE2 to S as expressed  
157 by the vaccine not only confirms increased surface expression, it verifies conformational relevance  
158 of the surface-displayed S protein.

### 159 ***In Vivo* Studies in Mice**

#### 160 **Mice generated both anti-S and anti-N antibodies in response to SC prime, SC boost** 161 **vaccination**

162 In this study to test an SC hAd5 S-Fusion + N-ETSD prime followed by an SC boost, CD-1  
163 female mice received  $1 \times 10^{10}$  viral particles (VP) of either hAd5 Null or the vaccine, both  $n = 5$ ,  
164 on Days 0 and 21. Mice were euthanized and tissue collected for analysis on Day 28 (Fig. 1A).

165 Vaccinated mice generated anti-S antibodies that were shown to be neutralizing in surrogate  
166 and live virus assays (Fig. 1B, C, and D, respectively). Vaccinated mice also generated anti-N  
167 antibodies (Fig. 1E), and both the anti-S and anti-N antibodies were Th1 dominant (Fig. 1F).

168 Our neutralization data with live SARS-CoV-2 virus demonstrated the potency of the antibody  
 169 response generated following vaccination with hAd5 S-Fusion + N-ETSD, with evidence of high  
 170 neutralization even at a high dilution factor. In addition, a synergistic effect of pooled sera was  
 171 evident, with potent neutralization even greater than control convalescent serum at  $\geq 1:1,000$   
 172 dilution.

### The SC Prime with SC Boost Study

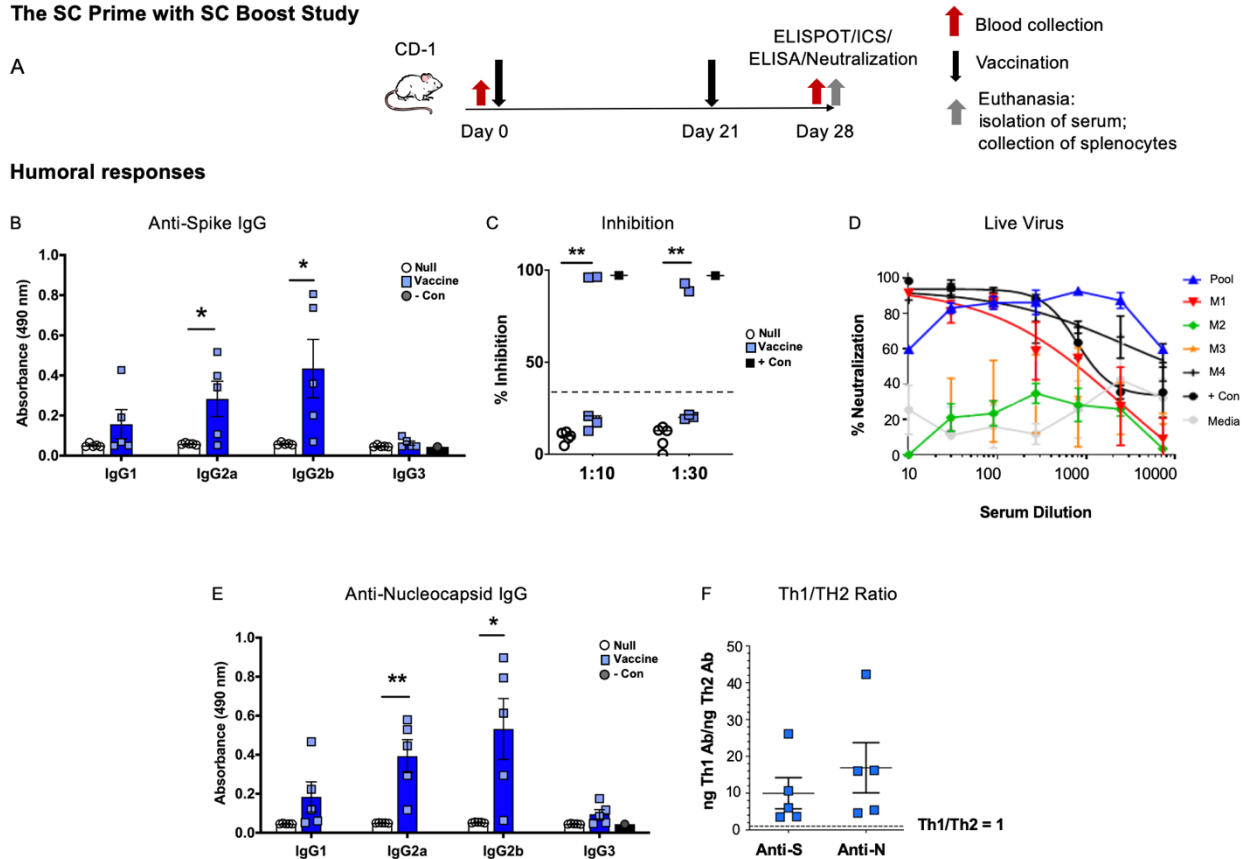

173  
 174 **Fig. 1** Humoral responses in the SC prime, SC boost study. (A) CD-1 mice received either hAd5  
 175 Null or the hAd5 S-Fusion + N-ETSD vaccine (both n = 5) on Day 0 and Day 21 by subcutaneous  
 176 (SC) injection and were euthanized for tissue collection on Day 28. (B) Anti-spike (S) antibody  
 177 levels in sera by isotype are shown (dilution 1:30); (C) results of the surrogate spike receptor  
 178 binding domain (S RBD): angiotensin-converting enzyme 2 (ACE2) binding assay where  
 179 inhibition of 35% or greater is associated with neutralization; and (D) percent neutralization in the  
 180 live virus assay are shown for the 4 vaccinated mice with assessable sera as well as pooled sera  
 181 from these mice. (E) Anti-nucleocapsid (N) antibody levels (dilution 1:90) by isotype and (F) the  
 182 T helper cell 1 (Th1)/Th2 ratios for both anti-S and anti-N antibodies with a ratio greater than 1  
 183 representing Th1 dominance. Statistics performed using an unpaired two-tailed Student's t-test  
 184 where \*p < 0.05 and \*\*p  $\leq$  0.01.

185



186 **N peptides elicited strong CD4<sup>+</sup> T-cell, but S peptides elicited strong CD8<sup>+</sup> T-cell responses**  
187 **in SC prime, SC boost vaccinated mice**

188 Intracellular cytokine staining (ICS) revealed that the N peptide pool stimulated interferon- $\gamma$   
189 (IFN- $\gamma$ ) and tumor necrosis factor alpha (TNF- $\alpha$ ) production in selected CD4<sup>+</sup> T-lymphocytes  
190 from vaccinated but not hAd5 Null mice (Fig. 2A and B). Conversely, the S1 peptide pool  
191 (containing S RBD) elicited higher IFN- $\gamma$ /TNF- $\alpha$  production in CD8<sup>+</sup> T-lymphocytes than the N  
192 peptide pool (Fig. 2C and D). ELISpot showed N peptides stimulated higher IFN- $\gamma$  secretion than  
193 the S1 peptide pool, but cytokine secretion was greater with both stimuli in T-cells from vaccinated  
194 mice as compared to Null (Fig. 2E). IL-4 secretion was very low, therefore the T-cell responses,  
195 like humoral responses, were Th1 dominant with the IFN- $\gamma$ /IL-4 ratio being >1 in 4 of 5 vaccinated  
196 mice (Fig. 2F and G).

The SC Prime with SC Boost Study: T-Cell Responses

CD4+ ICS

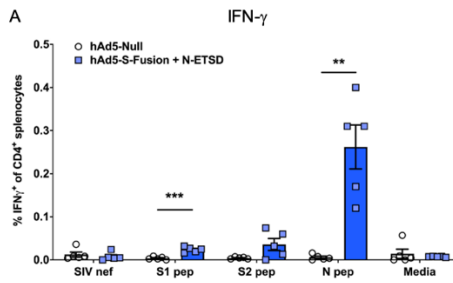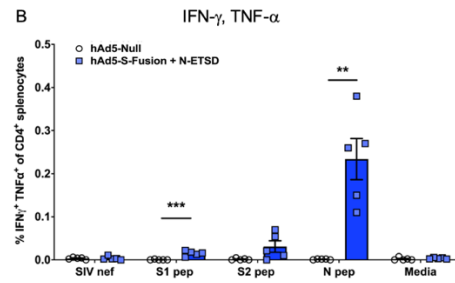

CD8+ ICS

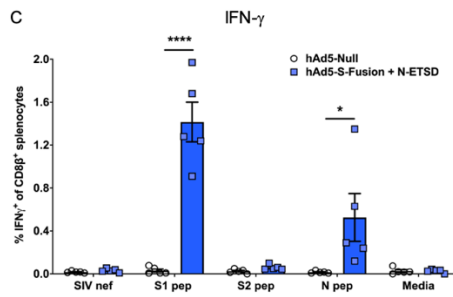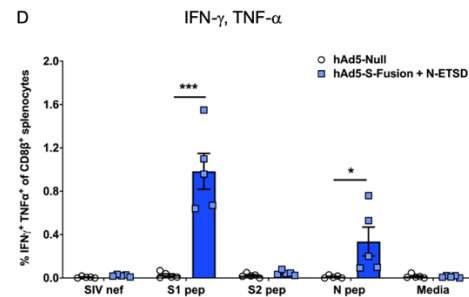

ELISpot

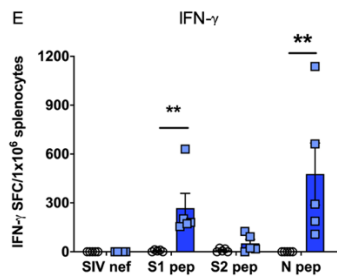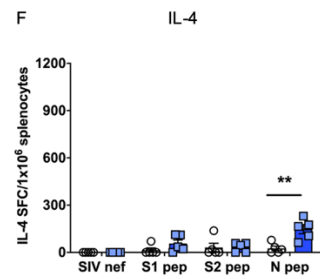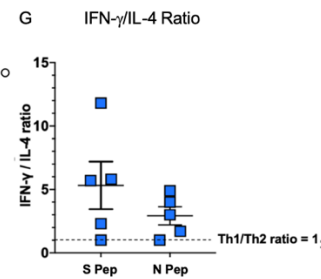

197  
 198 **Fig. 2** T-cell responses in SC prime, SC boost hAd5 S-Fusion + N-ETSD vaccinated mice.  
 199 Production of interferon- $\gamma$  (IFN- $\gamma$ ) for (A) CD4+ and (C) CD8 $\beta$ + T lymphocytes; and IFN- $\gamma$ /tumor  
 200 necrosis factor  $\alpha$  (TNF- $\alpha$ ) by (B) CD4+ and (D) CD8 $\beta$ + T lymphocytes by intracellular cytokine  
 201 staining (ICS) is shown. ELISpot detection of (E) IFN- $\gamma$  and (F) interleukin-4 (IL-4) by T-  
 202 lymphocytes is shown. In both ICS and ELISpot, cytokine production is stimulated by exposure  
 203 to S1, S2 or N peptide pools; media only and SIV nef are negative controls. (G) The IFN- $\gamma$ /IL-4  
 204 ratio > 1 reflects Th1 dominance. Statistical analyses performed using an unpaired, two-tailed  
 205 Student's t-test where \* $p < 0.05$ , \*\* $p \leq 0.01$ , and \*\*\* $p \leq 0.001$ .

206  
 207 **IN prime with an IN boost vaccination with hAd5 S-Fusion + N-ETSD elicited humoral**  
 208 **responses that were as good or better than SC prime with either SC or IN boost**

209 To both enhance and broaden immune responses by generation of mucosal immunity, we next  
 210 performed a study wherein the prime delivery by either SC and intranasal (IN) routes would be  
 211 compared when followed by either an SC or IN boost. The design of the SC versus IN prime with

212 SC or IN boost study is shown in Figure 3A. There were 4 groups of CD-1 mice: untreated, SC  
213 prime followed by SC boost (SC > SC), IN prime followed by IN boost (IN > IN), and SC prime  
214 followed by IN boost (SC > IN). SC doses were administered at  $1 \times 10^{10}$  VP and IN doses were  
215 administered at  $1 \times 10^9$  VP. The untreated group was  $n = 4$ , SC > SC and SC > IN were  $n = 8$  and  
216 IN > IN  $n = 7$ . Mice received the priming doses on Day 0 and boosting doses on Day 21. All mice  
217 were euthanized on Day 28 and tissue including blood for serum, spleens for T cells, and lung  
218 tissue collected for analyses.

219 Mice in all vaccinated groups produced anti-S IgG and overall, levels were the highest in sera  
220 from IN > IN group mice (Fig. 3B). Sera were highly neutralizing as reflected by high inhibition  
221 in the surrogate virus neutralization assay (Fig. 3C). Anti-N IgG was also detected in sera from all  
222 vaccinated mice, with the levels being very similar between vaccinated groups (Fig. 3D).

223 Similar to the findings for sera, anti-S IgG was detected in lung homogenate of all vaccinated  
224 mice and was higher overall for the IN > IN group (Fig. 3E). Lung homogenate from all IN > IN  
225 group mice showed high inhibition in the surrogate neutralization assay, whereas homogenate from  
226 4 mice in the SC > SC boost group did not surpass the 35% level of inhibition that is associated  
227 with viral neutralization (Fig. 3F). In lung homogenate, anti-N IgG showed a trend to higher in the  
228 SC > IN group (Fig. 3G). Not unexpectedly, both anti-S and anti-N IgA levels in lung homogenate  
229 were highest in the IN > IN boost group (Fig. 3H). Furthermore, the anti-S and anti-N responses  
230 in both sera and lung were highly Th1 dominant for all vaccinated groups (Fig. 3I).

### The SC versus IN Prime with IN or SC Boost Study

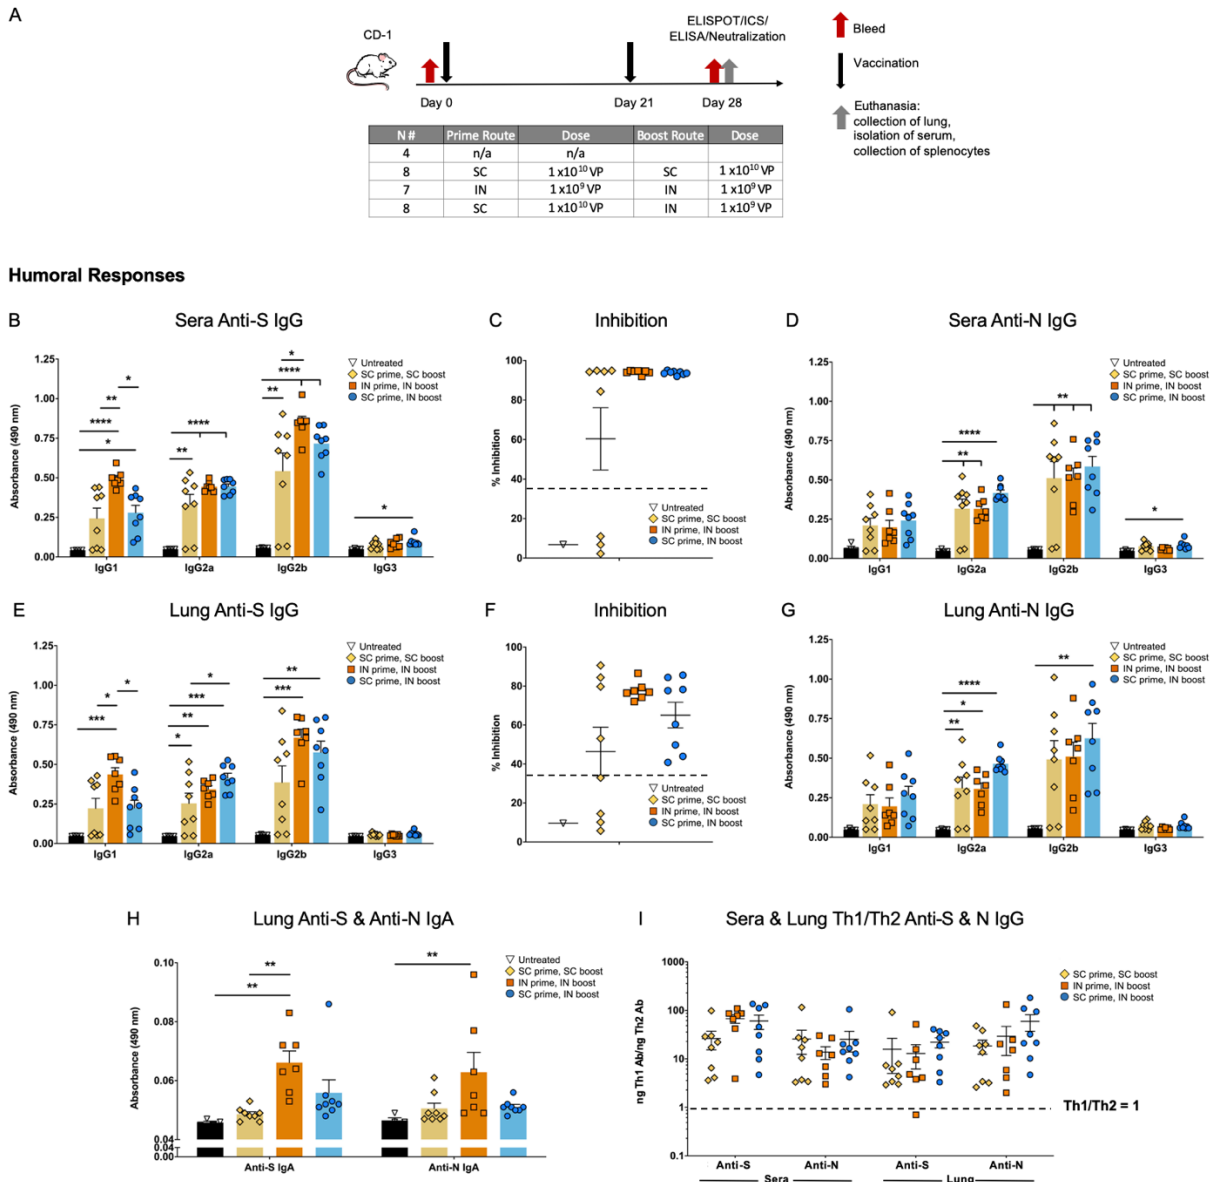

231  
 232 **Fig. 3** Humoral responses in the SC versus IN prime with SC or IN boost study. (A) CD-1 mice  
 233 were untreated (n = 4) or received an SC prime, SC boost (n = 8); IN prime, IN boost (n = 7); or  
 234 SC prime, IN boost (n = 8). (B) Sera levels of anti-S antibodies (dilution 1:30) by subtype are  
 235 shown and (C) percent inhibition in the surrogate neutralization assay of ACE2:S RBD binding  
 236 wherein inhibition of 35% or greater is associated with neutralization of viral infection. (D) Levels  
 237 of anti-N IgG in sera (dilution 1:270). (E) Anti-S IgG by subtype (dilution 1:30) and (F)  
 238 neutralization by lung homogenate. (G) Lung anti-N IgG levels (dilution 1:30). (H) Both anti-S  
 239 and anti-N IgA in lung homogenate. (I) The Th1/Th2 ratios for sera and lung anti-S and anti-N  
 240 antibodies where values greater than 1 represent Th1 dominance. Statistical analyses performed  
 241 using One-way ANOVA with Tukey's post-hoc analysis comparing each group to every other  
 242 group where \*p < 0.05; \*\*p ≤ 0.01; \*\*\*p ≤ 0.001; and \*\*\*\*p ≤ 0.0001.  
 243

244 **Both CD4+ and CD8+ T-cell responses were greater to N than S, and higher with SC delivery**

245 Intracellular cytokine staining (ICS) of IFN- $\gamma$  (Fig. 4A, D); IFN- $\gamma$ , TNF- $\alpha$  (Fig. 4B, E), and  
246 IFN- $\gamma$ , TNF- $\alpha$ , interleukin-2 (IL-2) (Fig. 4C, F) showed the highest mean values for the SC > SC  
247 boost and SC > IN vaccinated groups with responses to the N peptide pool trending higher for both  
248 CD4+ and CD8+ T cells. This was somewhat in contrast with the findings of the first SC > SC  
249 boost study (study 1 above) where CD8+ T-cell responses were greater to the S1 peptide pool (Fig.  
250 2C), however, variation is expected in outbred CD-1 mice and robust CD8+ responses to both S  
251 and N were detected in SC > SC mice from each study. While the differences were not statistically  
252 significant due to variation among individual mice, overall the IN > IN boost group had a reduced  
253 population of CD8+ cells capable of accumulating IFN- $\gamma$  (Fig. 4D) and IFN- $\gamma$  + TNF- $\alpha$  (Fig. 4E)  
254 in response to S and N peptide stimulation.

255 ELISpot findings were similar, with higher responses seen for the SC > SC and SC > IN  
256 groups when compared to the IN > IN group, and the highest responses were found to be specific  
257 to the N peptide pool (Fig. 4G). Interleukin-4 (IL-4) secretion in ELISpot was very low for all  
258 groups (Fig. 4H), therefore the IFN- $\gamma$ /IL-4 ratios were above 1 for almost all vaccinated mice in  
259 response to both S and N peptide pools (Fig. 4I).

260 The T-cell responses in this study suggested an important contribution of SC delivery to T cell  
261 responses.

**The SC versus IN Prime with IN or SC Boost Study: T-cell Responses**

**CD4+ ICS**

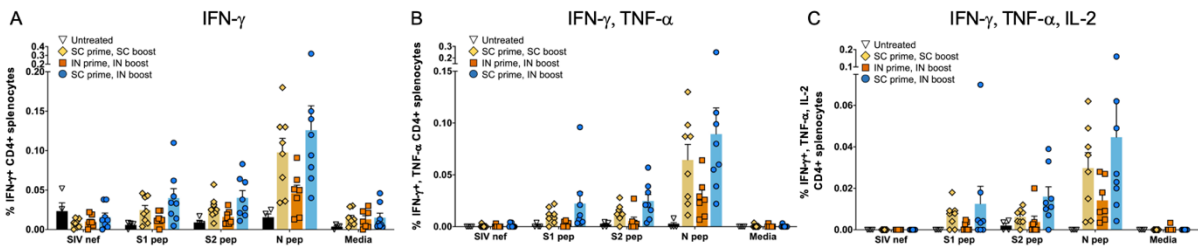

**CD8+ ICS**

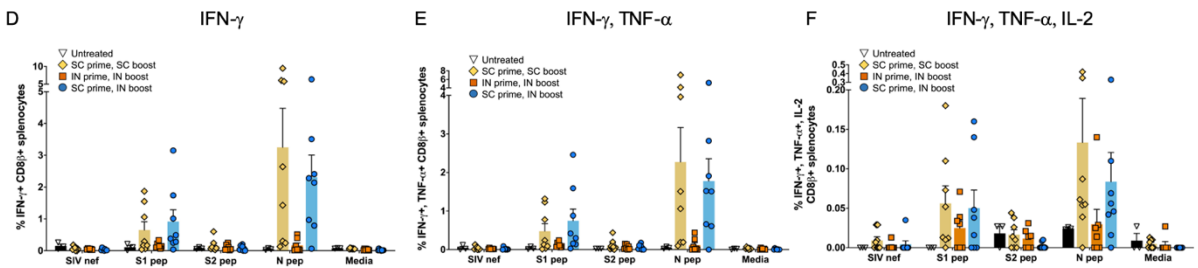

**ELISpot**

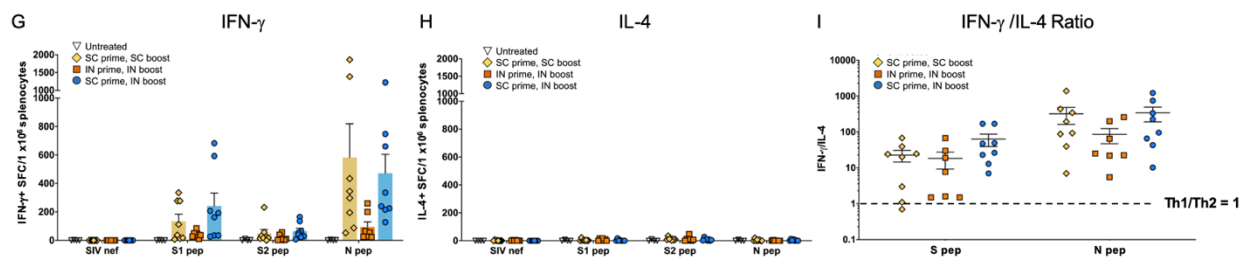

262  
 263 **Fig. 4** Both CD4+ and CD8+ T cells respond the nucleocapsid peptides in SC versus IN prime  
 264 study with SC or IN boost. Cytokine production in response to S1, S2 and N peptide pools as  
 265 detected by Intracellular cytokine staining (ICS) of (A) Interferon- $\gamma$  (IFN- $\gamma$ ); (B) IFN- $\gamma$  and tumor  
 266 necrosis factor  $\alpha$  (TNF- $\alpha$ ); and (C) IFN- $\gamma$ , TNF- $\alpha$ , and interleukin-2 (IL-2) production by CD4+  
 267 is shown. ICS (D-F) IFN- $\gamma$ ; IFN- $\gamma$ , TNF- $\alpha$ ; and IFN- $\gamma$ , TNF- $\alpha$ , and IL-2 for CD8+ T cells is shown.  
 268 Some outliers by the Grubb's test were removed. ELISpot for (G) IFN- $\gamma$  and (H) interleukin-4 (IL-  
 269 4) secretion in response to the peptide pools is shown. SIV nef is a negative control. (I) The IFN-  
 270  $\gamma$ /IL-4 ratio showing T helper cell 1 dominance. Statistical analyses performed using One-way  
 271 ANOVA with Dunnett's post-hoc comparison of each treatment group to untreated for each  
 272 peptide pool was performed but did not reveal statistically significant differences due to individual  
 273 variation amongst mice.

274  
 275 **Prime-only delivery by combined SC and IN dosing elicits humoral responses that are as**  
 276 **good or better than those with a boost**

277 To leverage both the humoral responses effectively elicited by IN delivery with the T-cell  
 278 responses that were greater with SC delivery, we then tested prime delivery by a combination of

279 the SC and IN routes, with either IN or SC boosts. This study design is shown in Figure 5A. There  
280 were 5 groups of CD-1 mice: untreated, an SC prime at  $1 \times 10^{10}$  viral particles (VP) without boost  
281 (SC > no boost), a combined  $9 \times 10^9$  VP SC plus  $1 \times 10^9$  VP IN prime (SC/IN) without boost  
282 (SC/IN > no boost), a combined SC/IN prime with  $1 \times 10^9$  VP IN boost (SC/IN > IN), and a  
283 combined SC/IN prime with a  $1 \times 10^{10}$  VP SC boost (SC/IN > SC). The untreated group was  $n =$   
284 4 and all vaccinated groups were  $n = 7$ . Mice received the prime on Day 0 and in appropriate  
285 groups, the boost on Day 21. All mice were euthanized on Day 35 and tissue including blood for  
286 serum, spleens for T cells, and lung tissue collected for analyses. Note this euthanasia day is one  
287 week later than the two studies described above (Figs. 1A and 3A), which was a change meant to  
288 better characterize humoral responses at a time point at which we expected cell-mediated responses  
289 to remain high based on our prior work with this vaccine platform.

290 The combined SC/IN > no boost regimen was just as effective in eliciting neutralizing anti-S  
291 IgG and anti-N IgG antibody production in both sera (Fig. 5B-D) and lung (Fig. 5E-G) as either  
292 the SC/IN > IN or SC/IN > SC regimens. SC > no boost gave significantly lower humoral  
293 responses (Fig. 5B-G). All humoral responses were Th1 dominant (Fig. 5H).

**The Combined SC+IN Prime with IN or SC Boost study**

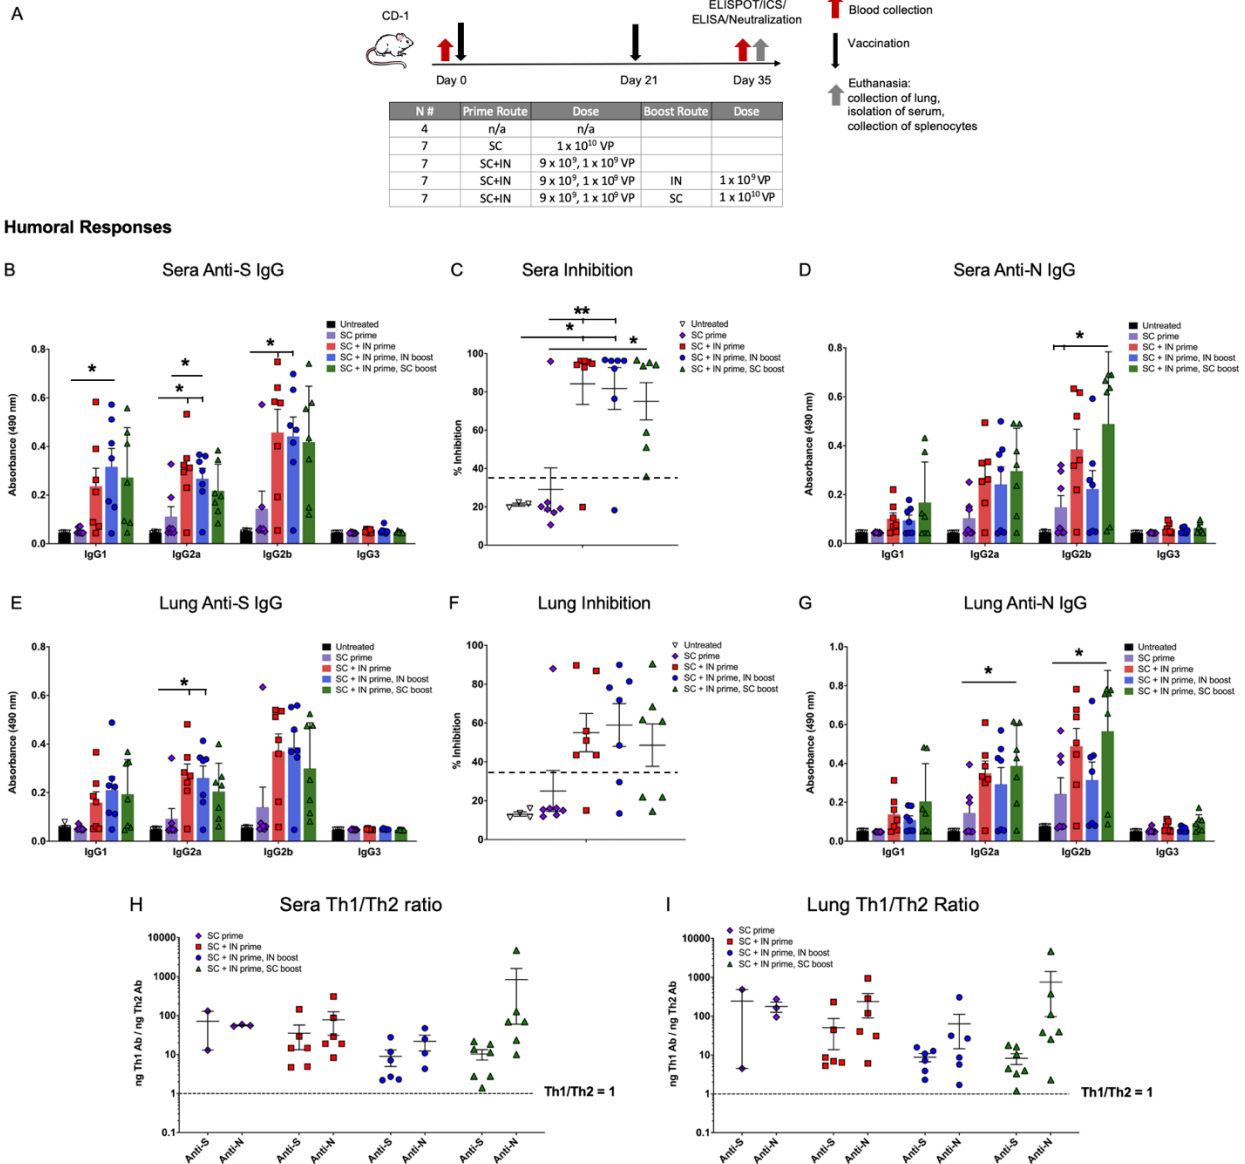

294  
 295 **Fig. 5** Subcutaneous (SC) plus intranasal (IN) prime without boost elicits Th1 dominant  
 296 neutralizing anti-S and anti-N antibodies. (A) The study design is shown with groups for SC prime  
 297 only, SC + IN prime only, and SC + IN prime with either an SC or IN boost, all n = 7. There was  
 298 an untreated control group (n = 4). Prime dosing was on Day 0, boosts on Day 21, and euthanasia  
 299 on Day 35. Shown are (B) serum anti-spike (S) antibodies by subtype (dilution 1:30); (C) %  
 300 inhibition in the surrogate neutralization assay with sera (>35% is correlated with neutralization  
 301 of virus); and (D) serum anti-nucleocapsid (N) antibodies (dilution 1:270). The same readouts (E)  
 302 anti-S antibodies; (F) neutralization; and (G) anti-N antibodies are shown for lung homogenate  
 303 (dilution 1:30 for anti-S and -N). The Th1/Th2 ratios for anti-S and anti-N antibodies are shown  
 304 for (H) sera and (I) lung. Statistical analyses performed using One-way ANOVA with Tukey's  
 305 post-hoc analysis comparing treatment groups within each antibody subtype or groups in the  
 306 neutralization assay where \*p < 0.05 and \*\* p ≤ 0.01.  
 307



308 **SC plus IN prime alone without a boost elicits CD4+ T cell responses to N and CD8+ T-cell**  
309 **responses to S**

310 Similar to the findings in the first study, ICS shows the N peptide pool stimulated cytokine  
311 production by CD4+ T lymphocytes from all vaccinated mice (Fig. 6A-C), but CD8+ T cells from  
312 vaccinated mice responded to S peptide pool 1 which contains the S RBD (Fig. 6D-F). The  
313 differences between vaccinated groups were not significant due to variability amongst mice, with  
314 SC/IN > no boost vaccinated mice having T-cell responses that were similar to those seen with  
315 mice that did receive boosts.

316 In ELISpot, the highest IFN- $\gamma$  secretion in response to peptide pools differed by both peptide  
317 pool and vaccination regimen. As compared to the negative control (SIV nef), T cell IFN- $\gamma$   
318 secretion was significantly greater for the combined SC/IN > SC group in response to the S1  
319 peptide pool; greater for the SC/IN > IN group to the S2 peptide pool; and greater for the SC/IN >  
320 no boost group to the N peptide pool (Fig. 6G).

321 IL-4 secretion was very low (Fig. 6H), therefore the IFN- $\gamma$ /IL-4 ratio was above 1 for all  
322 vaccinated mice with only one exception, reflecting Th1 dominance of T-cell responses (Fig. 6I).

323

324

325

326

327

328

329

The Combined SC+IN Prime with IN or SC Boost study: T-Cell Responses

CD4+ ICS

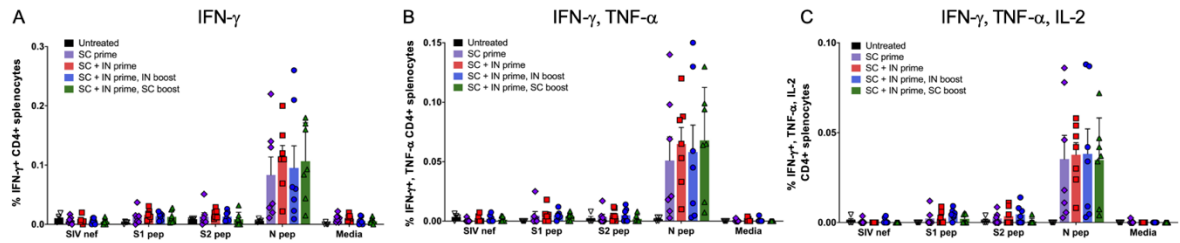

CD8+ ICS

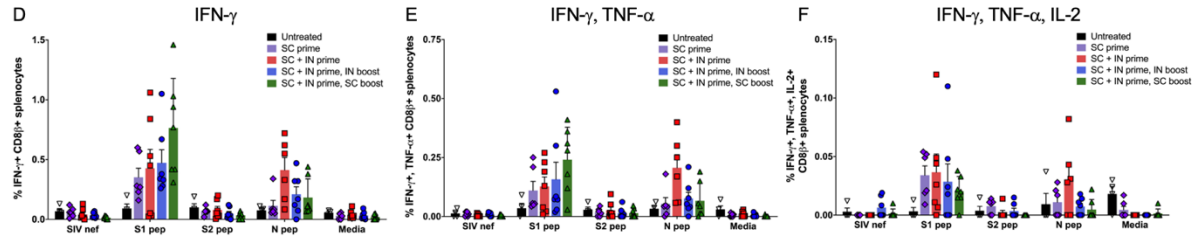

ELISpot

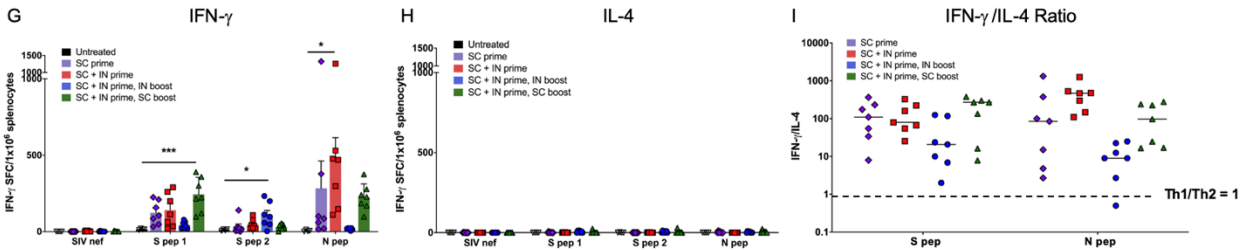

330  
 331 **Fig. 6** CD4+ T-cells respond to nucleocapsid (N) and CD8+ T cells to the spike in the combined  
 332 SC plus IN prime study with SC or IN boost. Interferon- $\gamma$  (IFN- $\gamma$ ); IFN- $\gamma$  and tumor necrosis factor  
 333  $\alpha$  (TNF- $\alpha$ ); and (C) IFN- $\gamma$ , TNF- $\alpha$ , and interleukin-2 (IL-2) production by CD4+ (A-C) and CD8+  
 334 (D-F) T-cells, respectively, in response to spike 1 (S1, containing the receptor binding domain),  
 335 S2, and N peptide pools as detected by intracellular cytokine staining (ICS). Some outliers by the  
 336 Grubb's test were removed. ELISpot for (G) IFN- $\gamma$  and (H) interleukin-4 (IL-4) secretion in  
 337 response to the peptide pools. SIV nef and media are negative controls. (I) The IFN- $\gamma$ /IL-4 ratio  
 338 showing T helper cell 1 dominance. Statistical analyses performed using One-way ANOVA with  
 339 Dunnett's post-hoc comparison of each treatment group to untreated for each peptide pool where  
 340 \* $p < 0.05$ , \*\* $p \leq 0.01$ , and \*\*\* $p \leq 0.001$ .  
 341

342 **DISCUSSION**

343 Our hAd5 S-Fusion + N-ETSD vaccine was designed to overcome the risks of an S-only  
 344 vaccine and elicit both T-cell immunity and neutralizing antibodies, leveraging the vital role T  
 345 cells play in generating long-lasting antibody responses and in directly killing infected cells. The

346 CD4<sup>+</sup> and CD8<sup>+</sup> T cells responses induced by this vaccine are multifunctional, and induction of  
347 such multifunctional T cells by vaccines is correlated with better protection against infection.<sup>43</sup>  
348 We posit that enhanced CD4<sup>+</sup> T-cell responses and Th1 predominance resulting from expression  
349 of an S antigen optimized for surface display and an N antigen optimized for endosomal/lysosomal  
350 subcellular compartment localization and thus MHC I and II presentation, led to increased  
351 dendritic cell presentation, cross-presentation, B cell activation, and ultimately high neutralization  
352 capability. Furthermore, the potent neutralization capability at high dilution seen for sera from  
353 hAd5 S-Fusion + N-ETSD vaccinated mice, combined with Th1 dominance of antibodies  
354 generated in response to both S and N antigens, supports the objective of this vaccine design.

355 It is well established that the contemporaneous MHC I and MHC II presentation of an antigen  
356 by the antigen presenting cell activates CD4<sup>+</sup> and CD8<sup>+</sup> T cells simultaneously and is optimal for  
357 the generation of memory B and T cells. A key finding of our construct is that N-ETSD, which we  
358 show is directed to the endosomal/lysosomal compartment, elicits a CD4<sup>+</sup> response, a necessity  
359 for induction of memory T cells and helper cells for B cell antibody production. Others have also  
360 reported on the importance of lysosomal localization for eliciting the strongest T-cell IFN- $\gamma$  and  
361 CTL responses, compared to natural N.<sup>44,45</sup>

362 The T-cell responses to the S and N antigens expressed by hAd5 S-Fusion + N-ETSD were  
363 polycytokine, including IFN- $\gamma$ , TNF- $\alpha$ , and IL-2 consistent with successful antimicrobial  
364 immunity in bacterial and viral infections.<sup>46-50</sup> Post-vaccination polycytokine T-cell responses  
365 have been shown to correlate with vaccine efficacy, including those with a viral vector.<sup>43</sup> Highly  
366 relevant here, polycytokine T-cell responses to SARS-CoV-2 N protein are consistent with  
367 recovered COVID-19 patients,<sup>20</sup> suggesting that the bivalent hAd5 S-Fusion + N-ETSD vaccine  
368 will provide vaccine subjects with greater protection against SARS-CoV-2.

369 The key finding here that prime-only vaccination delivered by combination SC and IN dosing  
370 results in broad humoral and T-cell responses, with the potential for enhanced mucosal immunity,  
371 supports the ongoing clinical testing of the hAd5 S-Fusion + N-ETSD. The vaccine has currently  
372 completed Phase 1 testing as an SC prime and SC boost, and oral boost formulations that have  
373 shown efficacy in the ability to elicit both humoral and T-cell responses that conferred complete  
374 protection against high-titer SARS-CoV-2 challenge in our pre-clinical studies in non-human  
375 primates, <sup>1</sup> will soon also be tested in the clinic. To our knowledge, our vaccine is currently the  
376 only one available in SC, thermally-stable oral,<sup>51</sup> and IN formulations that offer the expanded  
377 possibilities for efficient, feasible delivery across the globe, particularly in developing nations.

378

## 379 REFERENCES

- 380 1 Gabitzsch, E. *et al.* Complete Protection of Nasal and Lung Airways Against SARS-CoV-2  
381 Challenge by Antibody Plus Th1 Dominant N- and S-Specific T-Cell Responses to  
382 Subcutaneous Prime and Thermally-Stable Oral Boost Bivalent hAd5 Vaccination in an  
383 NHP Study. *bioRxiv*, 2020.2012.2008.416297, doi:10.1101/2020.12.08.416297 (2021).
- 384 2 Sieling, P. *et al.* Th1 Dominant Nucleocapsid and Spike Antigen-Specific CD4+ and CD8+  
385 Memory T Cell Recall Induced by hAd5 S-Fusion + N-ETSD Infection of Autologous  
386 Dendritic Cells from Patients Previously Infected with SARS-CoV-2. *medRxiv*,  
387 2020.2011.2004.20225417, doi:10.1101/2020.11.04.20225417 (2020).
- 388 3 Amalfitano, A., Begy, C. R. & Chamberlain, J. S. Improved adenovirus packaging cell lines  
389 to support the growth of replication-defective gene-delivery vectors. *Proceedings of the*  
390 *National Academy of Sciences of the United States of America* **93**, 3352-3356,  
391 doi:10.1073/pnas.93.8.3352 (1996).
- 392 4 Amalfitano, A. *et al.* Production and Characterization of Improved Adenovirus Vectors  
393 with the E1, E2b, and E3 Genes Deleted. *Journal of virology* **72**, 926,  
394 doi:10.1128/JVI.72.2.926-933.1998 (1998).
- 395 5 Gatti-Mays, M. E. *et al.* A Phase I Trial Using a Multitargeted Recombinant Adenovirus 5  
396 (CEA/MUC1/Brachyury)-Based Immunotherapy Vaccine Regimen in Patients with  
397 Advanced Cancer. *Oncologist* **25**, 479, doi:10.1634/theoncologist.2019-0608 (2019).
- 398 6 Gabitzsch, E. S. *et al.* Anti-tumor immunotherapy despite immunity to adenovirus using  
399 a novel adenoviral vector Ad5 [E1-, E2b-]-CEA. *Cancer Immunology, Immunotherapy* **59**,  
400 1131-1135, doi:10.1007/s00262-010-0847-8 (2010).

- 401 7 Gabitzsch, E. S. & Jones, F. R. New recombinant SAd5 vector overcomes Ad5 immunity  
402 allowing for multiple safe, homologous, immunizations. *J Clin Cell Immunol* **S4**, 001,  
403 doi:doi:10.4172/2155-9899 (2011).
- 404 8 Gabitzsch, E. S. *et al.* Anti-tumor immunotherapy despite immunity to adenovirus using  
405 a novel adenoviral vector Ad5 [E1-, E2b-]-CEA. *Cancer immunology, immunotherapy : CII*  
406 **59**, 1131-1135, doi:10.1007/s00262-010-0847-8 (2010).
- 407 9 Wrapp, D. *et al.* Cryo-EM structure of the 2019-nCoV spike in the prefusion  
408 conformation. *Science* **367**, 1260-1263, doi:10.1126/science.abb2507 (2020).
- 409 10 Lu, R. *et al.* Genomic characterisation and epidemiology of 2019 novel coronavirus:  
410 implications for virus origins and receptor binding. *Lancet (London, England)* **395**, 565-  
411 574, doi:10.1016/S0140-6736(20)30251-8 (2020).
- 412 11 Walls, A. C. *et al.* Structure, Function, and Antigenicity of the SARS-CoV-2 Spike  
413 Glycoprotein. *Cell* **181**, 281-292.e286, doi:10.1016/j.cell.2020.02.058 (2020).
- 414 12 Hamming, I. *et al.* Tissue distribution of ACE2 protein, the functional receptor for SARS  
415 coronavirus. A first step in understanding SARS pathogenesis. *J Pathol* **203**, 631-637,  
416 doi:10.1002/path.1570 (2004).
- 417 13 Tai, W. *et al.* Characterization of the receptor-binding domain (RBD) of 2019 novel  
418 coronavirus: implication for development of RBD protein as a viral attachment inhibitor  
419 and vaccine. *Cell Mol Immunol*, doi:10.1038/s41423-020-0400-4 (2020).
- 420 14 Suthar, M. S. *et al.* Rapid generation of neutralizing antibody responses in COVID-19  
421 patients. *Cell Reports Medicine*, doi:10.1016/j.xcrm.2020.100040.
- 422 15 Grifoni, A. *et al.* Targets of T Cell Responses to SARS-CoV-2 Coronavirus in Humans with  
423 COVID-19 Disease and Unexposed Individuals. *Cell* **181**, 1489,  
424 doi:10.1016/j.cell.2020.05.015 (2020).
- 425 16 Tegally, H. *et al.* Sixteen novel lineages of SARS-CoV-2 in South Africa. *Nature Medicine*,  
426 doi:10.1038/s41591-021-01255-3 (2021).
- 427 17 Leung, K., Shum, M. H., Leung, G. M., Lam, T. T. & Wu, J. T. Early transmissibility  
428 assessment of the N501Y mutant strains of SARS-CoV-2 in the United Kingdom, October  
429 to November 2020. *Euro Surveill* **26**, doi:10.2807/1560-7917.Es.2020.26.1.2002106  
430 (2021).
- 431 18 Davies, N. G. *et al.* Estimated transmissibility and severity of novel SARS-CoV-2 Variant  
432 of Concern 202012/01 in England. *medRxiv*, 2020.2012.2024.20248822,  
433 doi:10.1101/2020.12.24.20248822 (2020).
- 434 19 Zhang, W. *et al.* Emergence of a Novel SARS-CoV-2 Variant in Southern California. *JAMA*,  
435 doi:10.1001/jama.2021.1612 (2021).
- 436 20 Peng, H. *et al.* Long-lived memory T lymphocyte responses against SARS coronavirus  
437 nucleocapsid protein in SARS-recovered patients. *Virology* **351**, 466-475,  
438 doi:<https://doi.org/10.1016/j.virol.2006.03.036> (2006).
- 439 21 Shang, B. *et al.* Characterization and application of monoclonal antibodies against N  
440 protein of SARS-coronavirus. *Biochemical and Biophysical Research Communications*  
441 **336**, 110-117, doi:<https://doi.org/10.1016/j.bbrc.2005.08.032> (2005).
- 442 22 Azizi, A. *et al.* A combined nucleocapsid vaccine induces vigorous SARS-CD8+ T-cell  
443 immune responses. *Genet Vaccines Ther* **3**, 7, doi:10.1186/1479-0556-3-7 (2005).

- 444 23 Zeng, W. *et al.* Biochemical characterization of SARS-CoV-2 nucleocapsid protein.  
445 *Biochemical and biophysical research communications*, S0006-0291X(0020)30876-  
446 30877, doi:10.1016/j.bbrc.2020.04.136 (2020).
- 447 24 Narayanan, K., Chen, C.-J., Maeda, J. & Makino, S. Nucleocapsid-independent specific  
448 viral RNA packaging via viral envelope protein and viral RNA signal. *Journal of virology*  
449 **77**, 2922-2927, doi:10.1128/jvi.77.5.2922-2927.2003 (2003).
- 450 25 McBride, R., van Zyl, M. & Fielding, B. C. The coronavirus nucleocapsid is a  
451 multifunctional protein. *Viruses* **6**, 2991-3018, doi:10.3390/v6082991 (2014).
- 452 26 Nisreen, M. A. O. *et al.* Severe Acute Respiratory Syndrome Coronavirus 2–Specific  
453 Antibody Responses in Coronavirus Disease 2019 Patients. *Emerging Infectious Disease*  
454 *journal* **26**, 1478-1488, doi:10.3201/eid2607.200841 (2020).
- 455 27 Long, Q.-X. *et al.* Antibody responses to SARS-CoV-2 in patients with COVID-19. *Nature*  
456 *Medicine*, doi:10.1038/s41591-020-0897-1 (2020).
- 457 28 Altmann, D. M. & Boyton, R. J. SARS-CoV-2 T cell immunity: Specificity, function,  
458 durability, and role in protection. *Sci Immunol* **5**, doi: 10.1126/sciimmunol.abd6160,  
459 doi:10.1126/sciimmunol.abd6160 (2020).
- 460 29 Ni, L. *et al.* Detection of SARS-CoV-2-Specific Humoral and Cellular Immunity in COVID-  
461 19 Convalescent Individuals. *Immunity*, doi:10.1016/j.immuni.2020.04.023 (2020).
- 462 30 Weiskopf, D. *et al.* Phenotype and kinetics of SARS-CoV-2–specific T cells in COVID-19  
463 patients with acute respiratory distress syndrome. *Science Immunology* **5**, eabd2071,  
464 doi:10.1126/sciimmunol.abd2071 (2020).
- 465 31 Ng, O. W. *et al.* Memory T cell responses targeting the SARS coronavirus persist up to 11  
466 years post-infection. *Vaccine* **34**, 2008-2014, doi:10.1016/j.vaccine.2016.02.063 (2016).
- 467 32 Tang, F. *et al.* Lack of peripheral memory B cell responses in recovered patients with  
468 severe acute respiratory syndrome: a six-year follow-up study. *Journal of immunology*  
469 (*Baltimore, Md. : 1950*) **186**, 7264-7268, doi:10.4049/jimmunol.0903490 (2011).
- 470 33 Le Bert, N. *et al.* SARS-CoV-2-specific T cell immunity in cases of COVID-19 and SARS, and  
471 uninfected controls. *Nature* **584**, 457, doi:10.1038/s41586-020-2550-z (2020).
- 472 34 Sekine, T. *et al.* Robust T cell immunity in convalescent individuals with asymptomatic or  
473 mild COVID-19. *Cell* **183**, 158, doi:10.1101/2020.06.29.174888 (2020).
- 474 35 Vabret, N. Antibody responses to SARS-CoV-2 short-lived. *Nature Reviews Immunology*,  
475 doi:10.1038/s41577-020-0405-3 (2020).
- 476 36 Polack, F. P. *et al.* Safety and Efficacy of the BNT162b2 mRNA Covid-19 Vaccine. *N Engl J*  
477 *Med* **383**, 2603-2615, doi:10.1056/NEJMoa2034577 (2020).
- 478 37 Baden, L. R. *et al.* Efficacy and Safety of the mRNA-1273 SARS-CoV-2 Vaccine. *N Engl J*  
479 *Med* **384**, 403-416, doi:10.1056/NEJMoa2035389 (2021).
- 480 38 Magrone, T., Magrone, M. & Jirillo, E. Focus on Receptors for Coronaviruses with Special  
481 Reference to Angiotensin- Converting Enzyme 2 as a Potential Drug Target - A  
482 Perspective. *Endocr Metab Immune Disord Drug Targets* **20**, 807-811,  
483 doi:10.2174/1871530320666200427112902 (2020).
- 484 39 Fehr, A. R. & Perlman, S. Coronaviruses: an overview of their replication and  
485 pathogenesis. *Methods in molecular biology (Clifton, N.J.)* **1282**, 1-23, doi:10.1007/978-  
486 1-4939-2438-7\_1 (2015).

- 487 40 Bourouiba, L. Turbulent Gas Clouds and Respiratory Pathogen Emissions: Potential  
488 Implications for Reducing Transmission of COVID-19. *Jama* **323**, 1837-1838,  
489 doi:10.1001/jama.2020.4756 (2020).
- 490 41 Sterlin, D. *et al.* IgA dominates the early neutralizing antibody response to SARS-CoV-2.  
491 *Sci Transl Med* **13**, doi:10.1126/scitranslmed.abd2223 (2021).
- 492 42 Tan, C. W. *et al.* A SARS-CoV-2 surrogate virus neutralization test based on antibody-  
493 mediated blockage of ACE2-spike protein-protein interaction. *Nat Biotechnol* **38**, 1073-  
494 1078, doi:10.1038/s41587-020-0631-z (2020).
- 495 43 Darrah, P. A. *et al.* Multifunctional TH1 cells define a correlate of vaccine-mediated  
496 protection against *Leishmania major*. *Nat Med* **13**, 843-850, doi:10.1038/nm1592  
497 (2007).
- 498 44 Gupta, V. *et al.* SARS coronavirus nucleocapsid immunodominant T-cell epitope cluster  
499 is common to both exogenous recombinant and endogenous DNA-encoded  
500 immunogens. *Virology* **347**, 127-139, doi:10.1016/j.virol.2005.11.042 (2006).
- 501 45 Yang, K. *et al.* Immune responses to T-cell epitopes of SARS CoV-N protein are enhanced  
502 by N immunization with a chimera of lysosome-associated membrane protein. *Gene*  
503 *Ther* **16**, 1353-1362, doi:10.1038/gt.2009.92 (2009).
- 504 46 Lichterfeld, M. *et al.* HIV-1-specific cytotoxicity is preferentially mediated by a subset of  
505 CD8(+) T cells producing both interferon-gamma and tumor necrosis factor-alpha. *Blood*  
506 **104**, 487-494, doi:10.1182/blood-2003-12-4341 (2004).
- 507 47 Betts, M. R. *et al.* HIV nonprogressors preferentially maintain highly functional HIV-  
508 specific CD8+ T cells. *Blood* **107**, 4781-4789, doi:10.1182/blood-2005-12-4818 (2006).
- 509 48 Cox, M. A. & Zajac, A. J. Shaping successful and unsuccessful CD8 T cell responses  
510 following infection. *J Biomed Biotechnol* **2010**, 159152-159152,  
511 doi:10.1155/2010/159152 (2010).
- 512 49 Rosendahl Huber, S., van Beek, J., de Jonge, J., Luytjes, W. & van Baarle, D. T cell  
513 responses to viral infections - opportunities for Peptide vaccination. *Front Immunol* **5**,  
514 171-171, doi:10.3389/fimmu.2014.00171 (2014).
- 515 50 Seder, R. A., Darrah, P. A. & Roederer, M. T-cell quality in memory and protection:  
516 implications for vaccine design. *Nat Rev Immunol* **8**, 247-258, doi:10.1038/nri2274  
517 (2008).
- 518 51 Stewart, M., Ward, S. J. & Drew, J. Use of adenovirus as a model system to illustrate a  
519 simple method using standard equipment and inexpensive excipients to remove live  
520 virus dependence on the cold-chain. *Vaccine* **32**, 2931-2938,  
521 doi:10.1016/j.vaccine.2014.02.033 (2014).
- 522 52 Zhu, F.-C. *et al.* Safety, tolerability, and immunogenicity of a recombinant adenovirus  
523 type-5 vectored COVID-19 vaccine: a dose-escalation, open-label, non-randomised, first-  
524 in-human trial. *The Lancet*, doi:10.1016/S0140-6736(20)31208-3.
- 525 53 van Doremalen, N. *et al.* ChAdOx1 nCoV-19 vaccination prevents SARS-CoV-2  
526 pneumonia in rhesus macaques. *bioRxiv*, 2020.2005.2013.093195,  
527 doi:10.1101/2020.05.13.093195 (2020).
- 528 54 Amalfitano, A. & Chamberlain, J. S. Isolation and characterization of packaging cell lines  
529 that coexpress the adenovirus E1, DNA polymerase, and preterminal proteins:  
530 implications for gene therapy. *Gene Ther* **4**, 258-263, doi:10.1038/sj.gt.3300378 (1997).

- 531 55 Seregin, S. S. & Amalfitano, A. Overcoming pre-existing adenovirus immunity by genetic  
532 engineering of adenovirus-based vectors. *Expert Opin Biol Ther* **9**, 1521-1531,  
533 doi:10.1517/14712590903307388 (2009).
- 534 56 Srinivasan, S. *et al.* Structural Genomics of SARS-CoV-2 Indicates Evolutionary Conserved  
535 Functional Regions of Viral Proteins. *Viruses* **12**, 360, doi:10.3390/v12040360 (2020).
- 536 57 Schaack, J. *et al.* Promoter strength in adenovirus transducing vectors: down-regulation  
537 of the adenovirus E1A promoter in 293 cells facilitates vector construction. *Virology* **291**,  
538 101-109, doi:10.1006/viro.2001.1211 (2001).
- 539 58 Tan, C. W. *et al.* A SARS-CoV-2 surrogate virus neutralization test based on antibody-  
540 mediated blockage of ACE2-spike protein-protein interaction. *Nat Biotechnol*,  
541 doi:10.1038/s41587-020-0631-z (2020).
- 542

543

544

545

546

547

548

549

550

551

552

553

554

555

556

557

558

559



560 **SUPPLEMENTARY INFORMATION**

561

562 **METHODS**

563

564 *The hAd5 [E1-, E2b-, E3-] platform and constructs*

565

566 For studies here, the next generation hAd5 [E1-, E2b-, E3-] vector was used (Fig. S1A) to  
567 create viral vaccine candidate constructs. This hAd5 [E1-, E2b-, E3-] vector is primarily  
568 distinguished from other first-generation [E1-, E3-] recombinant Ad5 platforms<sup>52,53</sup> by having  
569 additional deletions in the early gene 2b (E2b) region that remove the expression of the viral DNA  
570 polymerase (pol) and in pre terminal protein (pTP) genes, and its propagation in the E.C7 human  
571 cell line.<sup>3,4,54,55</sup>

572 The hAd5 S-Fusion + N-ETSD vaccine we utilized the hAd5 [E1-, E2b-, E3-] comprises a  
573 wildtype spike (S) sequence [accession number YP009724390] modified with a proprietary linker  
574 peptide sequence as well as a wildtype nucleocapsid (N) sequence [accession number  
575 YP009724397] with a an Enhanced T-cell Stimulation Domain (ETSD) signal sequence to direct  
576 translated N to the endosomal/lysosomal pathway.<sup>2</sup> The SARS-CoV-2 S protein is found on the  
577 viral surface<sup>11</sup> and the N protein is found in the interior of the virus<sup>23,56</sup> (Fig. S1B).

578 The powerful cytomegalovirus (CMV) promoter<sup>57</sup> drives expression in the hAd5 construct  
579 (Fig. S1C).

580

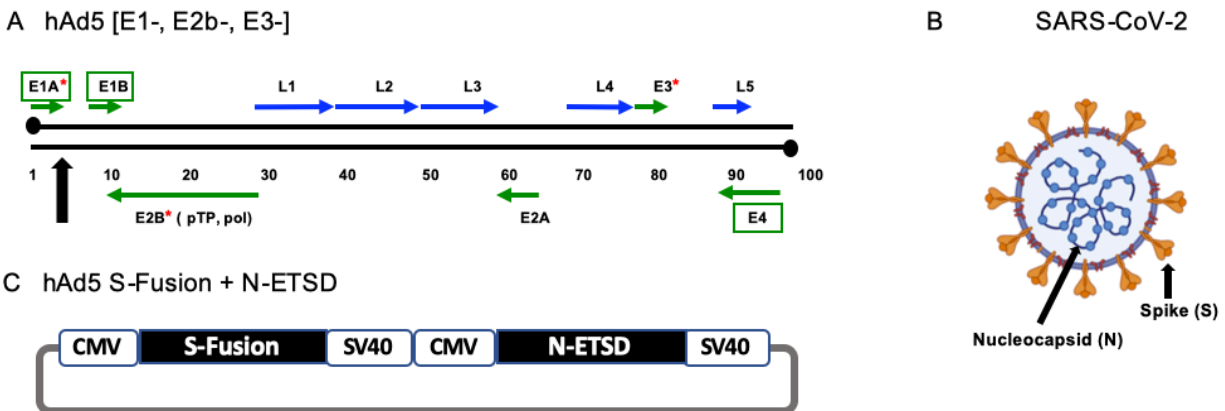

581

582 **Fig. S1** *The SARS-CoV-2 virus, the hAd5 [E1-, E2b-, E3-] vector and the dual antigen hAd5 S-*  
583 *Fusion + N-ETSD vaccine.* (A) The second-generation human adenovirus serotype 5 (hAd5)  
584 vector used has the E1, E2b, and E3 regions deleted. Sequences for the vaccine antigen cargo are  
585 inserted at the black arrow. (B) The spike (S) glycoprotein is displayed as a trimer on the surface  
586 of SARS-CoV-2 and the nucleocapsid (N) protein is found in the virus interior, associated with  
587 the viral RNA. (C) The vaccine antigens are under control of the cytomegalovirus (CMV) promoter  
588 and sequences end with SV40 poly-A.

589

590 *Transfection of HEK 293T cells with hAd5 constructs and flow cytometric analysis of RBD*  
591 *surface expression*

592

593 To determine surface expression of the RBD epitope by vaccine candidate constructs, we  
594 transfected HEK 293T cells with hAd5 construct DNA and quantified surface RBD by flow  
595 cytometric detection using anti-RBD antibodies. The constructs tested were: S-WT, S-WT + N-

596 ETSD, S-Fusion, S-Fusion + N-ETSD, and N-ETSD. HEK 293T cells ( $2.5 \times 10^5$  cells/well in 24  
597 well plates) were grown in DMEM (Gibco Cat# 11995-065) with 10% FBS and 1X PSA (100  
598 units/mL penicillin, 100  $\mu\text{g}/\text{mL}$  streptomycin, 0.25  $\mu\text{g}/\text{mL}$  Amphotericin B) at 37°C. Cells were  
599 transfected with 0.5  $\mu\text{g}$  of hAd5 plasmid DNA using a JetPrime transfection reagent (Polyplus  
600 Catalog # 89129-924) according to the manufacturer's instructions. Cells were harvested 1, 2, 3,  
601 and 7 days post transfection by gently pipetting cells into medium and labeled with an anti-RBD  
602 monoclonal antibody (clone D003 Sino Biological Catalog # 40150-D003) and F(ab')<sub>2</sub>-Goat anti-  
603 Human IgG-Fc secondary antibody conjugated with R-phycoerythrin (ThermoFisher Catalog #  
604 H10104). Labeled cells were acquired using a Thermo-Fisher Attune NxT flow cytometer and  
605 analyzed using Flowjo Software.

606

#### 607 *ACE2-IgG1Fc binding to hAd5 transfected HEK 293T cells*

608

609 HEK 293T cells were cultured at 37°C under conditions described above for transfection with  
610 hAd5 S-WT, S-Fusion, and S-Fusion + N-ETSD and were incubated for 2 days and harvested for  
611 ACE2-Fc binding analysis. Recombinant ACE2-IgG1Fc protein was produced using Maxcyte  
612 transfection in CHO-S cells that were cultured for 14 days. ACE2-IgG1Fc was then purified using  
613 a MabSelect SuRe affinity column on AKTA Explorer. Purified ACE2-IgG1Fc was dialyzed into  
614 10 mM HEPES, pH7.4, 150 mM NaCl and concentrated to 2.6 mg/mL. For binding studies, the  
615 ACE2-IgG1Fc was used at a concentration of 1  $\mu\text{g}/\text{mL}$  for binding. Cells were incubated with  
616 ACE2-Fc for 20 minutes and, after a washing step, were then labeled with a PE conjugated F(ab')<sub>2</sub>-  
617 goat anti-human IgG Fc secondary antibody at a 1:100 dilution, incubated for 20 minutes, washed  
618 and acquired on flow cytometer. Histograms are based on normalized mode (NM) of cell count –  
619 count of cells positive for signal in PE channel.

620

#### 621 *Murine immunization and blood/tissue collection*

622

623 CD-1 female mice (Charles River Laboratories) 6-8 weeks of age were used for  
624 immunological studies performed at the vivarium facilities of Omeros Inc. (Seattle, WA). Mice  
625 were administered subcutaneous (SC) injections at the indicated doses in 50  $\mu\text{L}$  ARM buffer (20  
626 mM Tris pH 8.0, 25 mM NaCl, with 2.5% glycerol) or intranasal (IN) injections at the indicated  
627 doses in 10  $\mu\text{L}$  ARM buffer (5  $\mu\text{L}$  per nostril) while under isoflurane anesthesia. On the final day  
628 of each study, blood was collected via the submandibular vein from isoflurane-anesthetized mice  
629 for isolation of sera using a microtainer tube and then mice were euthanized for collection of spleen  
630 and lungs.

631 Spleens were removed from each mouse and placed in 5 mL of sterile media  
632 (RPMI/HEPES/Pen/Strep/10% FBS). Splenocytes were isolated within 2 hours of collection and  
633 used fresh or frozen for later analysis.

634 Lungs were removed from each mouse, dissected in half and then immediately snap frozen  
635 on dry ice. Lung homogenates were generated by thawing one frozen lung half and homogenizing  
636 in 150  $\mu\text{L}$  sterile PBS using a Fisher Scientific pestle drill. Homogenates were centrifuged at  
637 13,000 rpm for 3 minutes and supernatants were utilized in ELISA and cPass surrogate  
638 neutralization assays.

639

#### 640 *Intracellular cytokine stimulation (ICS)*

641

642 ICS assays were performed using  $10^6$  live splenocytes per well in 96-well U-bottom plates.  
643 Splenocytes in RPMI media supplemented with 10% FBS were stimulated by the addition of pools  
644 of overlapping peptide for S or N antigens at 2  $\mu\text{g}/\text{mL}$ /peptide for 6 h at 37°C in 5%  $\text{CO}_2$ , with  
645 protein transport inhibitor, GolgiStop (BD) added two hours after initiation of incubation. The S  
646 peptide pool (JPT: Cat #PM-WCPV-S-1) is a total of 315 spike peptides split into two pools  
647 comprised of 158 and 157 peptides each. The N peptide pool (JPT; Cat # PM-WCPV-NCAP-1)  
648 was also used to stimulate cells. A SIV-Nef peptide pool (BEI Resources) was used as an off-target  
649 negative control. Stimulated splenocytes were then stained for a fixable cell viability stain  
650 followed by the lymphocyte surface markers CD8 $\beta$  and CD4, fixed with CytoFix (BD),  
651 permeabilized, and stained for intracellular accumulation of IFN- $\gamma$ , TNF- $\alpha$  and IL-2 (in studies 2  
652 and 3). Fluorescent-conjugated antibodies against mouse CD8 $\beta$  antibody (clone H35-17.2,  
653 ThermoFisher), CD4 (clone RM4-5, BD), IFN- $\gamma$  (clone XMG1.2, BD), TNF- $\alpha$  (clone MP6-XT22,  
654 BD) and IL-2 (clone JES6-5H4; BD), and staining was performed in the presence of unlabeled  
655 anti-CD16/CD32 antibody (clone 2.4G2; BD). Flow cytometry was performed using a Beckman-  
656 Coulter Cytoflex S flow cytometer and analyzed using Flowjo Software.

657

#### 658 *ELISpot assay*

659

660 ELISpot assays were used to detect cytokines secreted by splenocytes from inoculated mice.  
661 Fresh splenocytes were used on the same day, as were cryopreserved splenocytes containing  
662 lymphocytes. The cells ( $2-4 \times 10^5$  cells per well of a 96-well plate) were added to the ELISpot  
663 plate containing an immobilized primary antibodies to either IFN- $\gamma$  or IL-4 (BD), and were  
664 exposed to various stimuli (e.g. control peptides, target peptide pools/proteins) comprising 2  
665  $\mu\text{g}/\text{mL}$  peptide pools or 10  $\mu\text{g}/\text{mL}$  protein for 36-40 hours. After aspiration and washing to remove  
666 cells and media, extracellular cytokine was detected by a secondary antibody to cytokine  
667 conjugated to biotin (BD). A streptavidin/horseradish peroxidase conjugate was used detect the  
668 biotin-conjugated secondary antibody. The number of spots per well, or per  $2-4 \times 10^5$  cells, was  
669 counted using an ELISpot plate reader. A Th1/Th2 ratio was calculated by dividing the IFN- $\gamma$  spot  
670 forming cells (SFC) per million splenocytes with the IL-4 SFC per million splenocytes for each  
671 animal.

672

#### 673 *ELISA for detection of antibodies*

674

675 For IgG antibody detection in sera and lung homogenate from inoculated mice, ELISAs  
676 specific for spike and nucleocapsid antibodies, as well as for IgG subtype (IgG1, IgG2a, IgG2b,  
677 and IgG3) antibodies were used. In addition, for IgA antibody detection in lung homogenate from  
678 inoculated mice, ELISAs specific for spike and nucleocapsid antibodies, as well as for IgA was  
679 used. A microtiter plate was coated overnight with 100 ng of either purified recombinant SARS-  
680 CoV-2 S-FTD (full-length S with fibrin trimerization domain, constructed and purified in-house  
681 by ImmunityBio), SARS-CoV-2 S RBD (Sino Biological, Beijing, China; Cat # 401591-V08B1-  
682 100) or purified recombinant SARS-CoV-2 nucleocapsid (N) protein (Sino Biological, Beijing,  
683 China; Cat # 40588-V08B) in 100  $\mu\text{L}$  of coating buffer (0.05 M Carbonate Buffer, pH 9.6). The  
684 wells were washed three times with 250  $\mu\text{L}$  PBS containing 1% Tween 20 (PBST) to remove  
685 unbound protein and the plate was blocked for 60 minutes at room temperature with 250  $\mu\text{L}$  PBST.  
686 After blocking, the wells were washed with PBST, 100  $\mu\text{L}$  of either diluted serum or diluted lung  
687 homogenate samples were added to wells, and samples incubated for 60 minutes at room  
688 temperature. After incubation, the wells were washed with PBST and 100  $\mu\text{L}$  of a 1/5000 dilution

689 of anti-mouse IgG HRP (GE Health Care; Cat # NA9310V), or anti-mouse IgG<sub>1</sub> HRP (Sigma; Cat  
690 # SAB3701171), or anti-mouse IgG<sub>2a</sub> HRP (Sigma; Cat # SAB3701178), or anti-mouse IgG<sub>2b</sub> HRP  
691 (Sigma; catalog# SAB3701185), anti-mouse IgG<sub>3</sub> HRP conjugated antibody (Sigma; Cat #  
692 SAB3701192), or anti-mouse IgA HRP conjugated antibody (Sigma; Cat # A4789) was added to  
693 wells. For positive controls, a 100 µL of a 1/5000 dilution of rabbit anti-N IgG Ab or 100 µL of a  
694 1/25 dilution of mouse anti-S serum (from mice immunized with purified S antigen in adjuvant)  
695 were added to appropriate wells. After incubation at room temperature for 1 hour, the wells were  
696 washed with PBS-T and incubated with 200 µL o-phenylenediamine-dihydrochloride (OPD  
697 substrate (Thermo Scientific Cat # A34006) until appropriate color development. The color  
698 reaction was stopped with addition of 50 µL 10% phosphoric acid solution (Fisher Cat # A260-  
699 500) in water and the absorbance at 490 nm was determined using a microplate reader (SoftMax®  
700 Pro, Molecular Devices).

701

702 *Calculation of relative ng amounts of antibodies and the Th1/Th2 ratio*

703

704 A standard curve of IgG was generated and absorbance values were converted into mass  
705 equivalents for both anti-S and anti-N antibodies. Using these values, we were able to calculate  
706 that hAd5 S-Fusion + N-ETSD vaccination generated a geometric mean value for S- and N-  
707 specific IgG per milliliter of serum. These values were also used to generate a Th1/Th2 ratio for  
708 the humoral responses by dividing the sum total of Th1 skewed antigen-specific IgG isotypes  
709 (IgG<sub>2a</sub>, IgG<sub>2b</sub> and IgG<sub>3</sub>) with the total Th2 skewed IgG<sub>3</sub>, for each mouse. Some responses,  
710 particularly for anti-N responses in IgG<sub>2a</sub> and IgG<sub>2b</sub> (both Th1 skewed isotypes), were above the  
711 limit of quantification with OD values higher than those observed in the standard curve. These  
712 data points were reduced to values within the standard curve, and thus will reflect a lower Th1/Th2  
713 skewing than would otherwise be reported.

714

715 *cPass<sup>TM</sup> neutralizing antibody detection*

716

717 The GenScript cPass<sup>TM</sup> ([https://www.genscript.com/cpass-sars-cov-2-neutralization-  
718 antibody-detection-Kit.html](https://www.genscript.com/cpass-sars-cov-2-neutralization-antibody-detection-Kit.html)) for detection of neutralizing antibodies was used according to the  
719 manufacturer's instructions.<sup>58</sup> The kit detects circulating neutralizing antibodies against SARS-  
720 CoV-2 that block the interaction between the S RBD with the ACE2 cell surface receptor. It is  
721 suitable for all antibody isotypes and appropriate for use with in animal models without  
722 modification.

723

724 *Vero E6 cell neutralization assay*

725

726 All aspects of the assay utilizing virus were performed in a BSL3 containment facility  
727 according to the ISMMS Conventional Biocontainment Facility SOPs for SARS-CoV-2 cell  
728 culture studies. Vero e6 kidney epithelial cells from *Cercopithecus aethiops* (ATCC CRL-1586)  
729 were plated at 20,000 cells/well in a 96-well format and 24 hours later, cells were incubated with  
730 antibodies or heat inactivated sera previously serially diluted in 3-fold steps in DMEM containing  
731 2% FBS, 1% NEAAs, and 1% Pen-Strep; the diluted samples were mixed 1:1 with SARS-CoV-2  
732 in DMEM containing 2% FBS, 1% NEAAs, and 1% Pen-Strep at 10,000 TCID<sub>50</sub>/mL for 1 hr. at  
733 37°C, 5% CO<sub>2</sub>. This incubation did not include cells to allow for neutralizing activity to occur  
734 prior to infection. The samples for testing included sera from the four mice that showed anti-S  
735 IgG<sub>2a</sub> and IgG<sub>2b</sub> antibody responses in Fig. 1B, pooled sera from those four mice, sera from a

736 COVID-19 convalescent patient, and media only. For detection of neutralization, 120  $\mu$ L of the  
737 virus/sample mixture was transferred to the Vero E6 cells and incubated for 48 hours before  
738 fixation with 4% PFA. Each well received 60  $\mu$ L of virus or an infectious dose of 600 TCID<sub>50</sub>.  
739 Control wells including 6 wells on each plate for no virus and virus-only controls were used. The  
740 percent neutralization was calculated as  $100 - ((\text{sample of interest} - [\text{average of "no virus"}]) / [\text{average}$   
741  $\text{of "virus only"}]) * 100$ ) with a stain for CoV-2 Np imaged on a Celigo Imaging Cytometer  
742 (Nexcelom Bioscience).

743

## 744 **SUPPLEMENTARY RESULTS**

745

### 746 **Enhanced HEK 293T cell-surface expression of RBD following transfection with Ad5 S-** 747 **Fusion + N-ETSD**

748

749 As shown in Figure S2, anti-RBD-specific antibodies did not detect RBD on the surface of  
750 HEK 293T cells transfected with hAd5 S-WT (Fig. 2A) or hAd5 S-WT + N-ETSD (Fig. 2B)  
751 constructs, while hAd5 S-Fusion alone was higher (Fig. 2C). Notably, the highest cell-surface  
752 expression of RBD was detected after transfection with dual antigen hAd5 S-Fusion + N-ETSD  
753 (Fig. 2D). Similar results were seen for recombinant ACE2-Fc binding to S-WT, S-Fusion and S-  
754 Fusion + N-ETSD, with ACE2 showing higher binding to S-Fusion than S-WT and the dual  
755 antigen construct showing the highest binding (Fig. S2F-H). These findings support our  
756 proposition that an hAd5 S-Fusion + N-ETSD construct, containing a high number and variety of  
757 antigens provided by both full-length, optimized S with proper folding and N leads to enhanced  
758 expression and cell surface display of RBD in a vaccine construct.  
759

### Anti-RBD Antibody

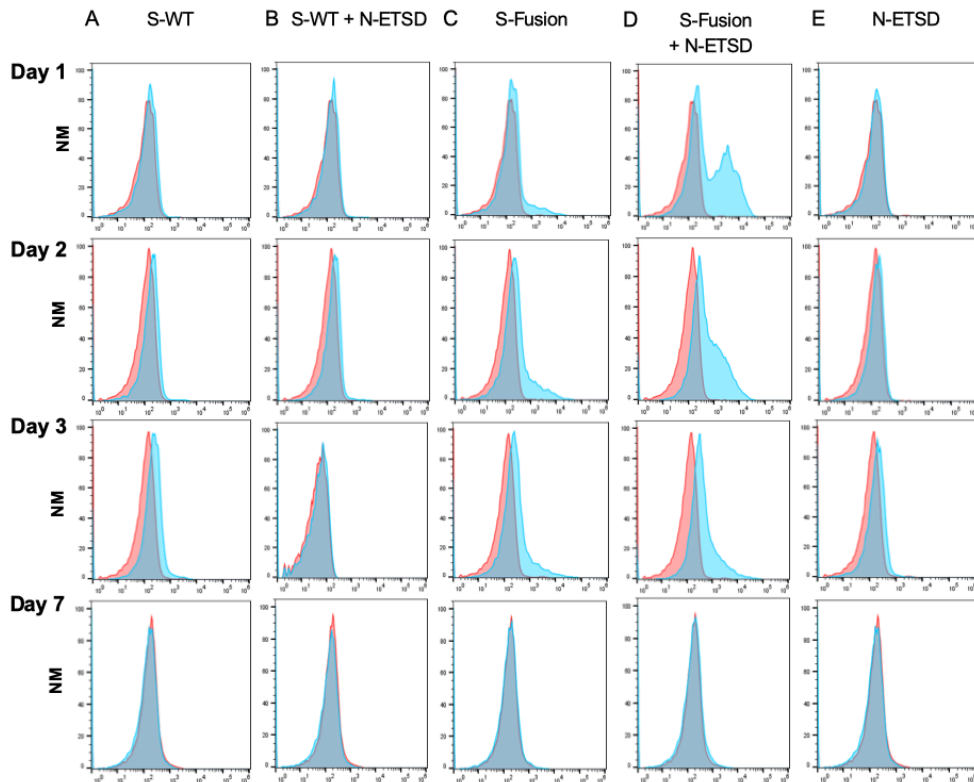

### ACE2-Fc

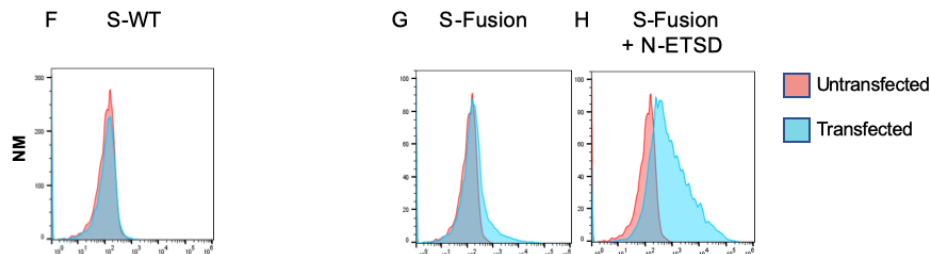

760

761 **Fig. S2** Transfection of HEK293T cells with hAd5 S-Fusion + ETSD results in enhanced surface  
762 expression of the spike receptor binding domain (RBD). Flow cytometric analysis of an anti-RBD  
763 antibody with construct-transfected cells reveals no detectable surface expression of RBD in either  
764 (A) S-WT or (B) S-WT + N-ETSD transfected cells. Expression was higher in (C) S-Fusion  
765 transfected cells as compared to S-WT. Cell surface expression of the RBD was high in (D) S-  
766 Fusion + N-ETSD transfected cells, particularly at day 1 and 2. (E) No expression was detected  
767 the N-ETSD negative control. Recombinant ACE2-Fc binding to (F) S-WT, (G) and S-Fusion, and  
768 (H) S-Fusion + N-ETSD is shown. Y-axis scale is normalized to mode (NM).
